# Supplementary material for: The luminescence inner filter effect of Mn2+-doped (ZnS)2·octylamine inorganic/organic hybrid thin films and their sensor application for environmental contaminants
Source: Royal Society of Chemistry journal article supplement (doi:10.1039/c5ra08518g), 2015-01-01
Supplement: c5ra08518g1.pdf [file c5ra08518g1.pdf]

Electronic Supporting Information for

**The luminescence inner filter effect of Mn<sup>2+</sup>-doping (ZnS)<sub>2</sub>·octylamine inorganic/organic hybrid thin films and its sensor application for environmental contaminants**

Yu Chen,<sup>a</sup> Jinhui Wang,<sup>a</sup> Jing Li,<sup>a</sup> Xinxin Li,<sup>b</sup> and Shuo Wei\*<sup>a</sup>

<sup>a</sup> College of Chemistry, Beijing Normal University, 19 Xijiekou Outside Street, 100875, Beijing, China

<sup>b</sup> Analytical and testing center, Beijing Normal University, 19 Xijiekou Outside Street, 100875, Beijing, China

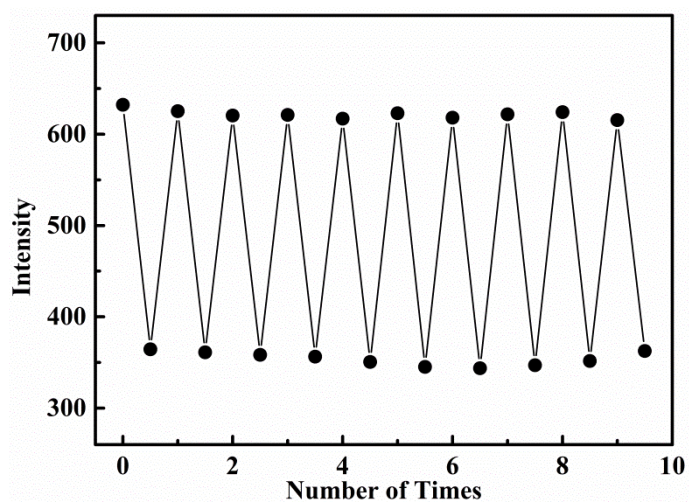

**Figure S1** The cycle reversibility of the Mn<sup>2+</sup> luminescence of the hybrid thin film responding to the BX aqueous solution (23.12μM, pH = 7)

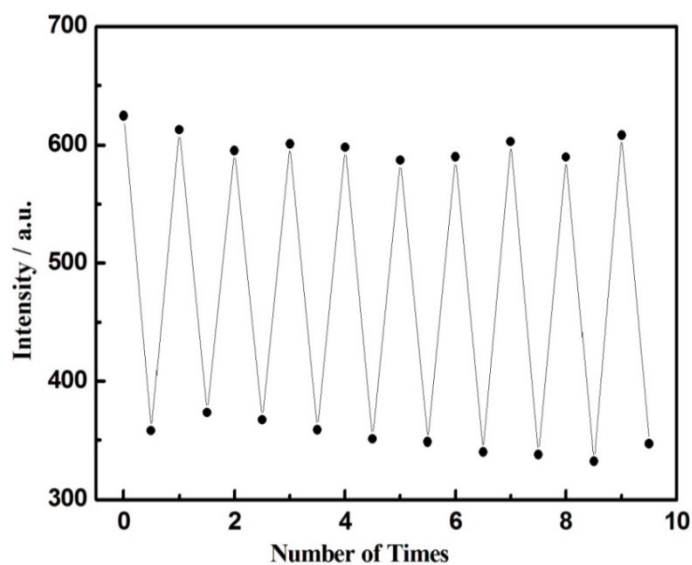

**Figure S2** The cycle reversibility of the Mn<sup>2+</sup> luminescence of the hybrid thin film responding to the RB5 aqueous solution (8.739μM, pH = 7)

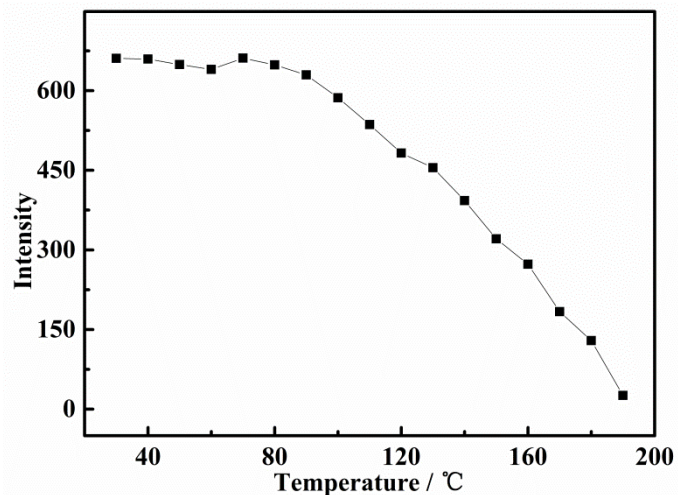

**Figure S3** The  $Mn^{2+}$  luminescence intensity of the hybrid thin film vs. heat treating temperature plot.

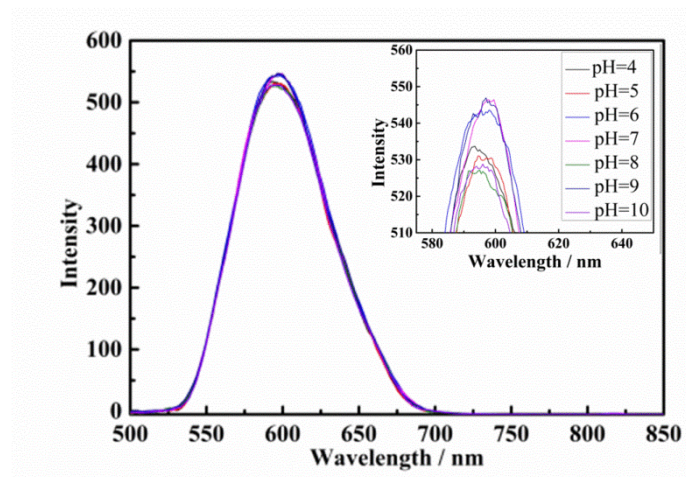

**Figure S4** The luminescence spectra of the hybrid thin film dipping into the blank aqueous solution with pH = 4 to 10
